# Supplementary material for: STAT3-blocked whole-cell hepatoma vaccine induces cellular and humoral immune response against HCC
Source: Springer Nature journal article supplement (doi:10.1186/s13046-017-0623-0), 2017-11-07
Supplement: MOESM1 [file 15205380]

**Table S1 The tumor formation rate in mice immunized with decoy**

|              | BALB/c |      | C57BL/6 |      |
|--------------|--------|------|---------|------|
|              | Number | Rate | Number  | Rate |
| <b>PBS</b>   | 18/18  | 100% | 12/12   | 100% |
| <b>Lipo</b>  | 17/18  | 94%  | 12/12   | 100% |
| <b>Scrm</b>  | 15/18  | 83%  | 12/12   | 100% |
| <b>Decoy</b> | 9/18   | 50%  | 12/12   | 100% |

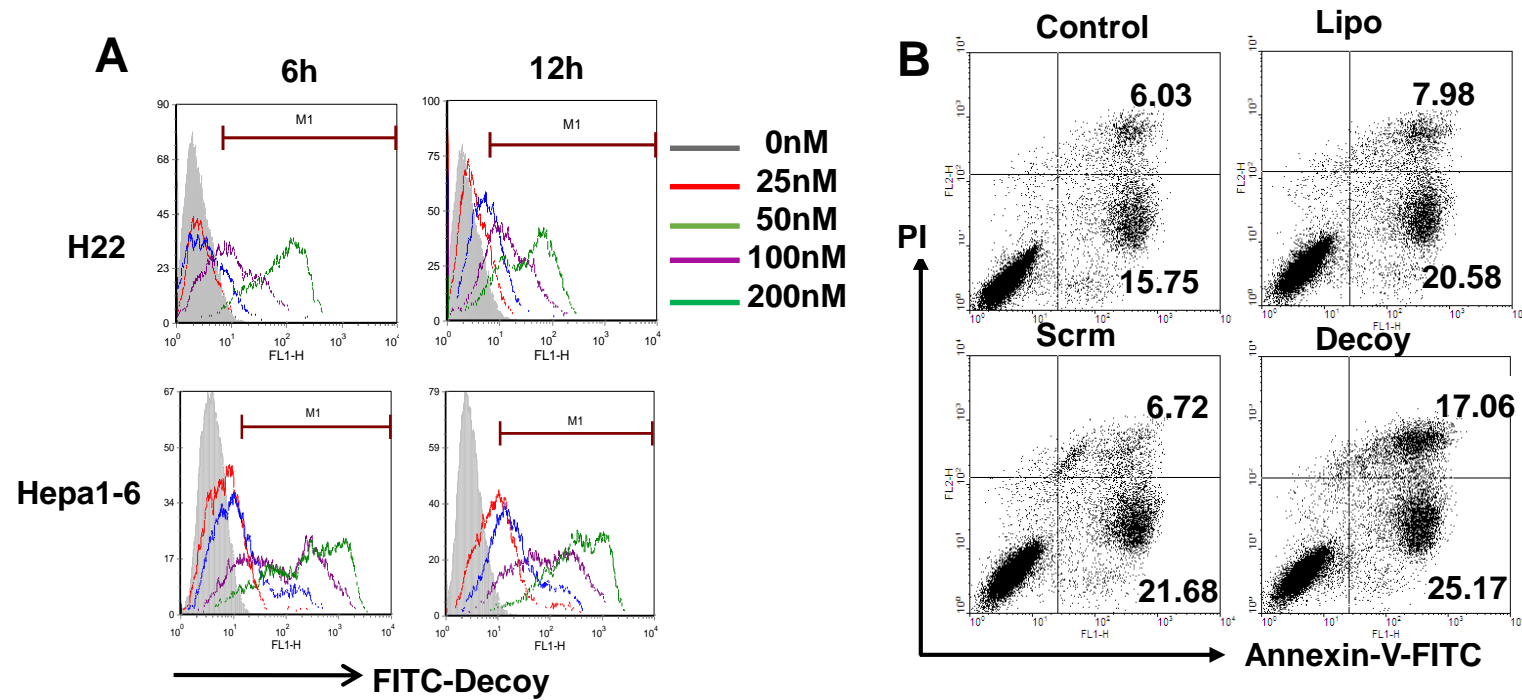

**Figure S1. Decoy ODN were effectively transfected into HCC cells and functional. A.** H22 cells and Hepa1-6 cells were transfected with FITC-labeled STAT3 Decoy ODN at final concentration of 25, 50, 100, and 200 nM by Lipofectamine™ 2000. After transfected for 6 h or 12 h, the transfection efficiency was examined by flow cytometry. **B.** H22 cells were transfected with 100 nM Decoy ODN for 12 h and then cultured in complete medium for 24h, the apoptosis rates were detected by Flow cytometry using Annexin V-FITC and PI. One representative of at least three independent experiments.

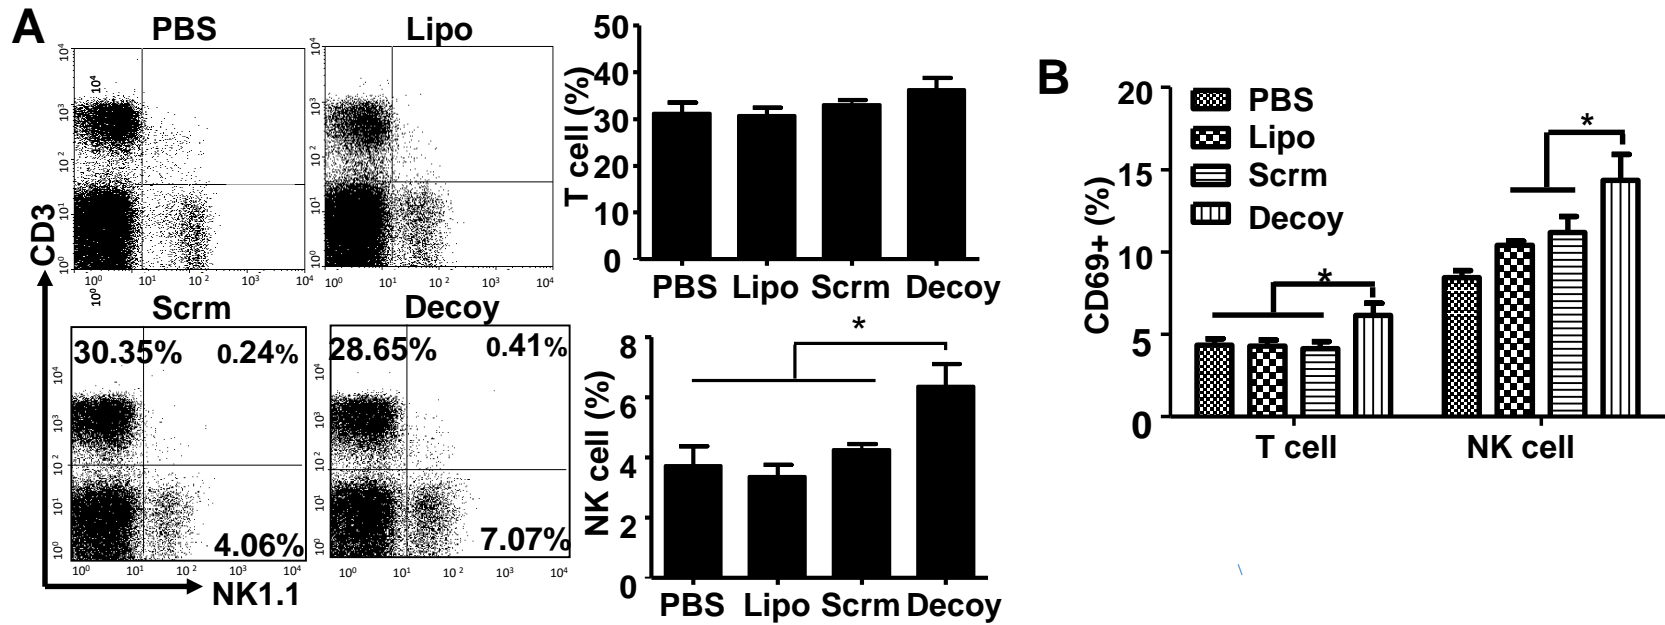

**Figure S2. HCC-vaccine can activate immune system in C57BL/6 mice.** C57BL/6 mice were immunized with Hepa1-6 tumor vaccine every week for three times. At the first week after the last immunization, the PBMCs were isolated and analyzed by flow cytometry. **A.** The proportion of CD3<sup>+</sup>NK1.1<sup>-</sup> or CD3<sup>-</sup>NK1.1<sup>+</sup> cells in PBMC of C57BL/6 mice. **B.** The expression of CD69 on T cells and NK cells of C57BL/6 mice were showed. Data were expressed as the mean  $\pm$  SD, statistical significance was determined as \* $p < 0.05$ ; \*\* $p < 0.01$  and \*\*\* $p < 0.001$  ( $n \geq 4$ ).

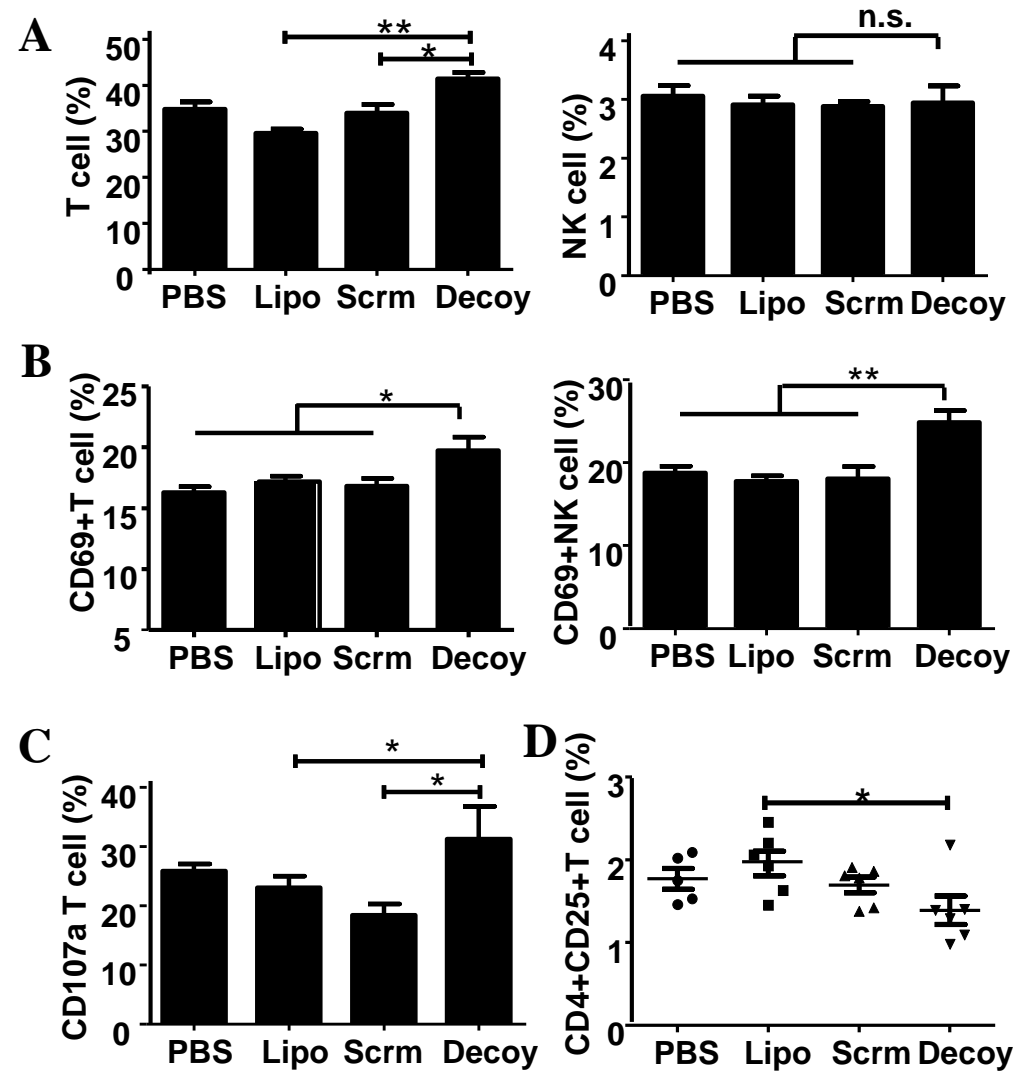

**Fig. S3. HCC vaccine induced the secondary immune response to HCC in C57BL/6 mouse model.** C57BL/6 mice were inoculated subcutaneously with  $2 \times 10^6$  tumor cells after 3 times immunization with HCC-vaccine, and then the PBMC of C57BL/6 mice were isolated when the



**Fig. S4. Genes encoding chemokines, molecules associated cell proliferation, and inflammatory molecules are regulated by STAT-3 blocking.** H22 cells and Hepa1-6 cells were transfected with STAT3 Decoy ODN at final concentration of 100nM by Lipofectamine™ 2000. After transfected for 24h, total RNA from each sample was amplified and transcribed into fluorescent cRNA with using the manufacturer's Agilent's Quick Amp Labeling protocol (version 5.7, Agilent Technologies). The labeled cRNAs were hybridized onto the Whole Mouse Genome Oligo Microarray (4x44K, Agilent Technologies). After having washed the slides, the arrays were scanned by the Agilent Scanner G2505C. Representatives of 3.0 fold up or down regulated gene were shown when STAT3 blocking or not. 1-6\_D represents Hepa1-6 cells transfected with STAT3 decoy, while 1-6\_S represents Hepa1-6 cells transfected with Scramble ODN.
